# Supplementary material for: PD-L1 is a novel direct target of HIF-1α, and its blockade under hypoxia enhanced MDSC-mediated T cell activation
Source: PubMed Central journal article supplement — J Exp Med. 2014 May 5;211(5):781–90. doi: 10.1084/jem.20131916 (PMC4010891; doi:10.1084/jem.20131916), 2014-05-05
Supplement: supp_jem.20131916_JEM_20131916_sm.pdf [file supp_jem.20131916_JEM_20131916_sm.pdf]

## SUPPLEMENTAL MATERIAL

Noman et al., <http://www.jem.org/cgi/content/full/jem.20131916/DC1>**Table S1.** Genomic oligonucleotide primers used for amplification of immunoprecipitated DNA samples from ChIP assays

| Primer             | Sequence                 |
|--------------------|--------------------------|
| VEGF-HRE-M-FWD     | CTGGGCAGCTGGCCTACCTACCTT |
| VEGF-HRE-M-REV     | GTTAGTCAGTGGCGGGGAGTGAGA |
| LDHA-HRE-M-FWD     | CGGGCTCCTGCTTCTGAGGCTGAG |
| LDHA-HRE-M-REV     | CCCACGCGTGCCCAAATCTGAAC  |
| SLC2A1-HRE-M-FWD   | CCTGCCTGCGCCCTTACATC     |
| SLC2A1-HRE-M-REV   | CATACCCAAACCCGCCCTACCTA  |
| HRE-1-PDL1-M-FWD   | TCCTTATGGAACCAAGGGAAC    |
| HRE-1-PDL1-M-REV   | TGGCCTCGAACTCAGAAATC     |
| HRE-2-3-PDL1-M-FWD | TGAGGAAGTCACCAAATCCA     |
| HRE-2-3-PDL1-M-REV | CGATTCCCCATCTCTTTCAA     |
| HRE-4-PDL1-M-FWD   | GTTTCACAGACAGCGGAGGT     |
| HRE-4-PDL1-M-REV   | CTTTAAAGTGCCTGCAAGC      |
